# Supplementary material
Source: publisher figshare collection journal article supplement (https://acs.figshare.com/ndownloader/files/5073865)
Supplement: Supplementary file 1 [file 5073865]

## Supporting information for:

### Sulfur Radical Cations. Kinetic and Products Study of the Photo-Induced Fragmentation Reactions of (Phenylsulfanylalkyl)trimethylsilanes and Phenylsulfanylacetic Acids Radical Cations.

*Enrico Baciocchi,\* Tiziana Del Giacco,\* Fausto Elisei, Andrea Lapi,*

#### Table of contents:

Preparation and characterization of **2** and **4**. S2

**Table S1.** Absorption maxima and transients produced by LFP of  $\text{NMQ}^+$ /toluene/ $\text{PhSCH(R)X}$  in  $\text{N}_2$ -saturated  $\text{CH}_3\text{CN}$ . S3

**Figure S1.** Observed rate constant ( $k_{\text{obs}}$ ) vs [4-CN-pyridine] and  $1/k_{\text{obs}}$  vs  $1/[4\text{-CN-pyridine}]$  for the decay of  $\mathbf{3}^{+\bullet}$  in  $\text{CH}_3\text{CN}$ . S4

**Figure S2.** Time-resolved absorption spectra of the 1,4-dicyanonaphthalene/ $\text{PhSCH(Ph)CO}_2\text{NMe}_4$  system in  $\text{N}_2$ -saturated  $\text{CH}_3\text{CN}$ . S4

## Preparation and characterization of 2 and 4.

*Phenyl(phenylsulfanyl)acetic acid (4)*.<sup>S1</sup> Butyllithium, (1.6 M in hexane, 6.4 mL, 10 mmol) was slowly added in a 50 mL three necked round bottom flask containing a stirred solution of benzyl phenyl sulfide (2 g, 10 mmol) in 30 mL of anhydrous THF at 0 °C under Ar atmosphere. The mixture was allowed to react for 1 h after which a slurry of diethyl ether and crunched solid CO<sub>2</sub> was slowly added. After the removal of CO<sub>2</sub> water was added and the aqueous layer was separated, filtered and acidified with diluted HCl. The obtained white solid was then filtrated, treated with dilute aqueous Na<sub>2</sub>CO<sub>3</sub>. Filtration and acidification of the aqueous solution gave 1.7 g (70 % yield) of a white solid. m. p. 101-103 °C (lit. 102-103 °C)<sup>S1</sup>

<sup>1</sup>H-NMR (300 MHz, CDCl<sub>3</sub>): δ: 7.2-7.5 (m, 10 H), 4.9 (s, 1 H).<sup>S2</sup>

*[Phenyl(phenylsulfanyl)methyl]trimethylsilane (2)*.<sup>S3</sup> Butyllithium, (1.6 M in hexane, 6.4 mL, 10 mmol) was slowly added in a 50 mL three necked round bottom flask containing a stirred solution of benzyl phenyl sulfide (2 g, 10 mmol) in 30 mL of anhydrous THF at 0 °C under Ar atmosphere. The mixture was allowed to react for 1 h after which trimethylsilyl chloride (1.4 mL, 10 mmol) was slowly added. The mixture was stirred 30 min at room temperature, poured in a saturated NH<sub>4</sub>Cl aqueous solution (40 mL) and extracted three times with diethyl ether. The recombined organic layers were dried over anhydrous Na<sub>2</sub>SO<sub>4</sub> and evaporated. After silica gel chromatography purification (eluant: hexane/ethyl acetate 9:1) 2.6 g of a colorless oil were obtained (96 % yield).

<sup>1</sup>H-NMR (300 MHz, CDCl<sub>3</sub>): δ: 7.0-7.4 (m, 10 H), 3.8 (s, 1 H), 0.1 (s, 9 H).<sup>S3</sup>

EI-MS (70 V): 73(100 %) [<sup>+</sup>SiMe<sub>3</sub>], 272 (50 %) [M<sup>+</sup>], 199 (23 %), 195 (27 %), 167 (27 %), 135 (28 %), 122 (22 %).

(S1) Lehto, S.; Shirley, D. A. *J. Org. Chem.* **1957**, 22, 989.

(S2) Ogura, K.; Itoh, H.; Morita, T.; Sanada, K.; Iida, H. *Bull. Chem. Soc. Jpn.* **1982**, 55, 1216.

(S2) Ager, D. J. *J. Chem. Soc., Perkin Trans. I* **1986**, 195.

**Table S1.** Absorption maxima and transients produced by LFP of NMQ<sup>+</sup>/toluene/sulfide in N<sub>2</sub>-saturated CH<sub>3</sub>CN.

| compd    | R                             | X                                 | $\lambda_{\text{max}}$ (nm) | transient                                                                            |
|----------|-------------------------------|-----------------------------------|-----------------------------|--------------------------------------------------------------------------------------|
| <b>1</b> | H                             | Si(CH <sub>3</sub> ) <sub>3</sub> | 330-340                     | 1 <sup>+</sup> •; C <sub>6</sub> H <sub>5</sub> SCH <sub>2</sub> •                   |
|          |                               |                                   | 400                         | NMQ•                                                                                 |
|          |                               |                                   | 540-560                     | 1 <sup>+</sup> •, NMQ•                                                               |
|          |                               |                                   | >700                        | 1 <sub>2</sub> <sup>+</sup> •                                                        |
|          |                               |                                   | 330,550 <sup>a</sup>        | 1 <sup>+</sup> •                                                                     |
| <b>2</b> | C <sub>6</sub> H <sub>5</sub> | Si(CH <sub>3</sub> ) <sub>3</sub> | 330-360                     | 2 <sup>+</sup> •; C <sub>6</sub> H <sub>5</sub> SC(C <sub>6</sub> H <sub>5</sub> )H• |
|          |                               |                                   | 400                         | NMQ•                                                                                 |
|          |                               |                                   | 540                         | 2 <sup>+</sup> •, NMQ•                                                               |
|          |                               |                                   | >700                        | 2 <sub>2</sub> <sup>+</sup> •                                                        |
|          |                               |                                   | <350, 530 <sup>a</sup>      | 2 <sup>+</sup> •                                                                     |
| <b>3</b> | H                             | COOH                              | 325-340                     | 3 <sup>+</sup> •; C <sub>6</sub> H <sub>5</sub> SCH <sub>2</sub> •                   |
|          |                               |                                   | 400                         | NMQ•                                                                                 |
|          |                               |                                   | 540                         | 3 <sup>+</sup> •, NMQ•                                                               |
|          |                               |                                   | > 700                       | 3 <sub>2</sub> <sup>+</sup> •                                                        |
|          |                               |                                   | 325, 530 <sup>a</sup>       | 3 <sup>+</sup> •                                                                     |
| <b>4</b> | C <sub>6</sub> H <sub>5</sub> | COOH                              | 330-360                     | 4 <sup>+</sup> •; C <sub>6</sub> H <sub>5</sub> SC(C <sub>6</sub> H <sub>5</sub> )H• |
|          |                               |                                   | 400                         | NMQ•                                                                                 |
|          |                               |                                   | 520                         | 4 <sup>+</sup> •, NMQ•                                                               |
|          |                               |                                   | >700                        | 4 <sub>2</sub> <sup>+</sup> •                                                        |
|          |                               |                                   | 530 <sup>a</sup>            | 4 <sup>+</sup> •                                                                     |

<sup>a</sup> In O<sub>2</sub>-saturated CH<sub>3</sub>CN.

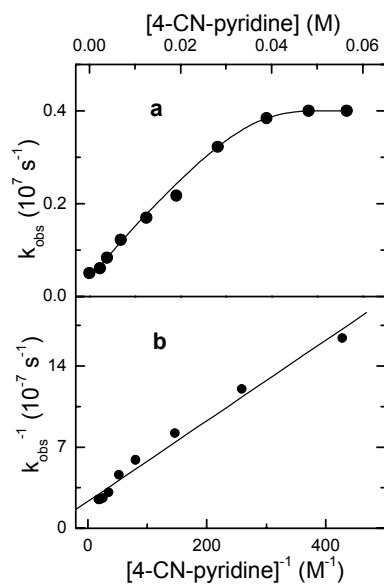

**Figure S1.** Observed rate constant ( $k_{\text{obs}}$ ) vs [4-CN-pyridine] (a) and  $1/k_{\text{obs}}$  vs  $1/[4\text{-CN-pyridine}]$  (b) for the decay of  $3^{+\bullet}$  in  $\text{CH}_3\text{CN}$ .

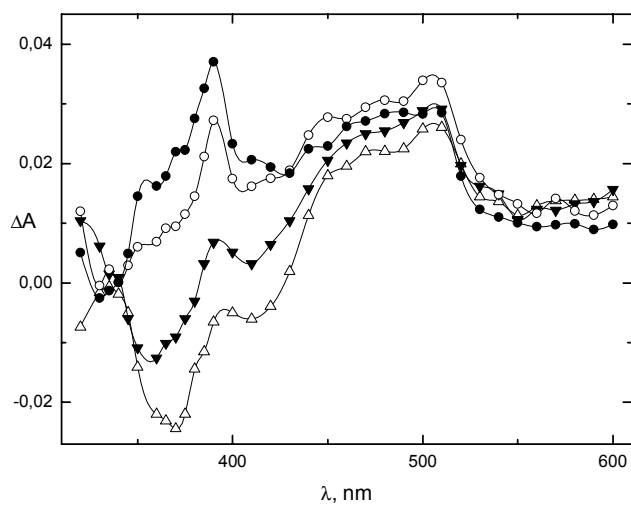

**Figure S2.** Time-resolved absorption spectra of the 1,4-dicyanonaphthalene ( $1.0 \times 10^{-4} \text{ M}$ )/ $\text{PhSCH(Ph)CO}_2\text{NMe}_4$  (0.01 M) system in  $\text{N}_2$ -saturated MeCN recorded 0.14 ( $\triangle$ ), 0.18 ( $\blacktriangle$ ), 0.33 (o) and 3.2 ( $\bullet$ )  $\mu\text{s}$  after the laser pulse.  $\lambda_{\text{exc}} = 355 \text{ nm}$ .
